# Supplementary material for: N-acetylneuraminic acid links immune exhaustion and accelerated memory deficit in diet-induced obese Alzheimer’s disease mouse model
Source: Springer Nature journal article supplement (doi:10.1038/s41467-023-36759-8), 2023-03-09
Supplement: MOESM1 [file 41467_2023_36759_MOESM1_ESM.pdf]

## Supplementary Information

### ***N*-acetylneuraminic acid links immune exhaustion and accelerated memory deficit in diet-induced obese Alzheimer's disease mouse model**

Stefano Suzzi<sup>1,#,\*</sup>, Tommaso Croese<sup>1,#</sup>, Adi Ravid<sup>2</sup>, Or Gold<sup>2</sup>, Abbe R. Clark<sup>3</sup>, Sedi Medina<sup>1</sup>, Daniel Kitsberg<sup>2</sup>, Miriam Adam<sup>2</sup>, Katherine A. Vernon<sup>3</sup>, Eva Kohnert<sup>3</sup>, Inbar Shapira<sup>2</sup>, Sergey Malitsky<sup>4</sup>, Maxim Itkin<sup>4</sup>, Alexander Brandis<sup>4</sup>, Tevie Mehlman<sup>4</sup>, Tomer M. Salame<sup>4</sup>, Sarah P. Colaiuta<sup>1</sup>, Liora Cahalon<sup>1</sup>, Michal Slyper<sup>3</sup>, Anna Greka<sup>3,\$,\*</sup>, Naomi Habib<sup>2,\$,\*</sup>, and Michal Schwartz<sup>1,\$,\*</sup>

<sup>1</sup>Weizmann Institute of Science, Department of Brain Sciences, Rehovot, Israel

<sup>2</sup>The Hebrew University of Jerusalem, Edmond & Lily Safra Center for Brain Sciences, Jerusalem, Israel

<sup>3</sup>Broad Institute of MIT and Harvard, Cambridge, MA, USA; Department of Medicine, Brigham and Women's Hospital and Harvard Medical School, Boston, MA, USA

<sup>4</sup>Weizmann Institute of Science, Life Sciences Core Facilities, Rehovot, Israel

<sup>#</sup>These authors contributed equally

<sup>\$</sup>These authors jointly supervised this work

\*Correspondence: [michal.schwartz@weizmann.ac.il](mailto:michal.schwartz@weizmann.ac.il) (M.Schwartz); [naomi.habib@mail.huji.ac.il](mailto:naomi.habib@mail.huji.ac.il) (N.H.); [agreka@broadinstitute.org](mailto:agreka@broadinstitute.org) (A.G.); [stefano.suzzi@weizmann.ac.il](mailto:stefano.suzzi@weizmann.ac.il) (S.S.).

**This file includes:**

**Supplementary Figures 1–16 and their legends**

**Supplementary Tables 1 and 2 and their legends**



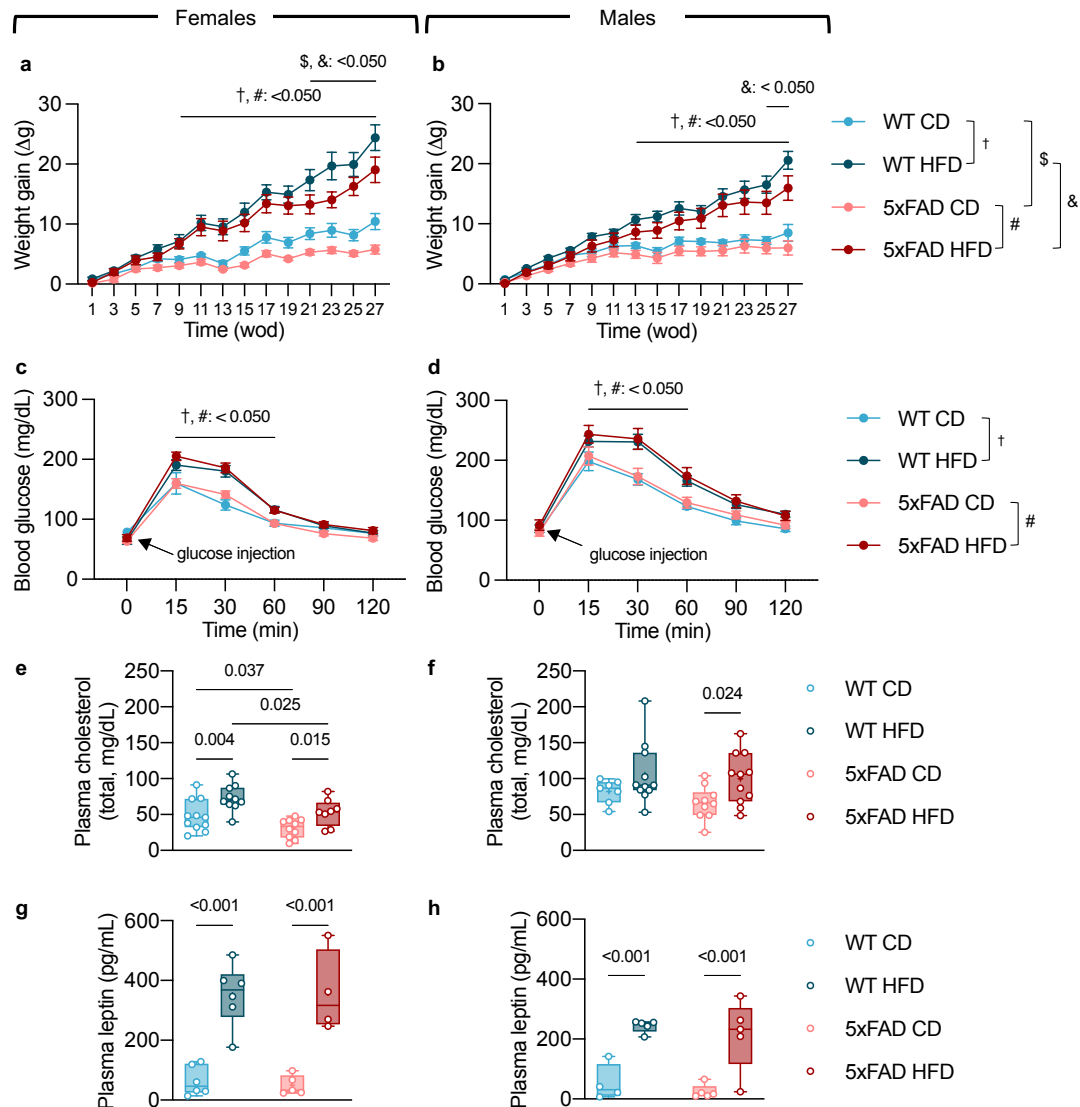

**Supplementary Fig. 1: HFD-related metabolic changes in mice.** **a, b**, Weight gain over time (weeks of diet, wod), means  $\pm$  s.e.m. **c, d**, Glucose tolerance test at 13 wod, means  $\pm$  s.e.m. **a–d**, Contrasts: †, WT CD vs. WT HFD; #, 5xFAD CD vs. 5xFAD HFD; \$, WT CD vs. 5xFAD CD; &, WT HFD vs. 5xFAD HFD. Exact *P* values for each time point are reported in the Source Data file. **e, f**, Total plasma cholesterol levels. **g, h**, Total plasma leptin levels. **a, c, e, g**, Data from female mice. **b, d, f, h**, Data from male mice. Mice from two independent experiments, sample *n*: **a**, WT CD=9, WT HFD=10, 5xFAD CD=9, 5xFAD HFD=8; **b**, WT CD=7, WT HFD=12, 5xFAD CD=10, 5xFAD HFD=11; **c**, WT CD=11, WT HFD=10, 5xFAD CD=10, 5xFAD HFD=9; **d**, WT CD=8, WT HFD=12, 5xFAD CD=10, 5xFAD HFD=13; **e**, WT CD=11, WT HFD=10, 5xFAD CD=10, 5xFAD HFD=8; **f**, WT CD=7, WT HFD=11, 5xFAD CD=10, 5xFAD HFD=11; **g**, WT

CD=6, WT HFD=6, 5xFAD CD=5, 5xFAD HFD=4; **h**, WT CD=4, WT HFD=5, 5xFAD CD=5, 5xFAD HFD=5. Some of these animals were used for the analyses described in Fig. 1–4 and Supplementary Fig. 2–10. Statistical analyses: **a–d**, two-way within-subjects ANOVA followed by Fisher’s LSD *post hoc* test; **e–h**, two-way ANOVA followed by Fisher’s LSD *post hoc* test. **e–h**, Box plots represent the minimum and maximum values (whiskers), the first and third quartiles (box boundaries), the median (box internal line), and the mean (cross). Source data are provided as a Source Data file.

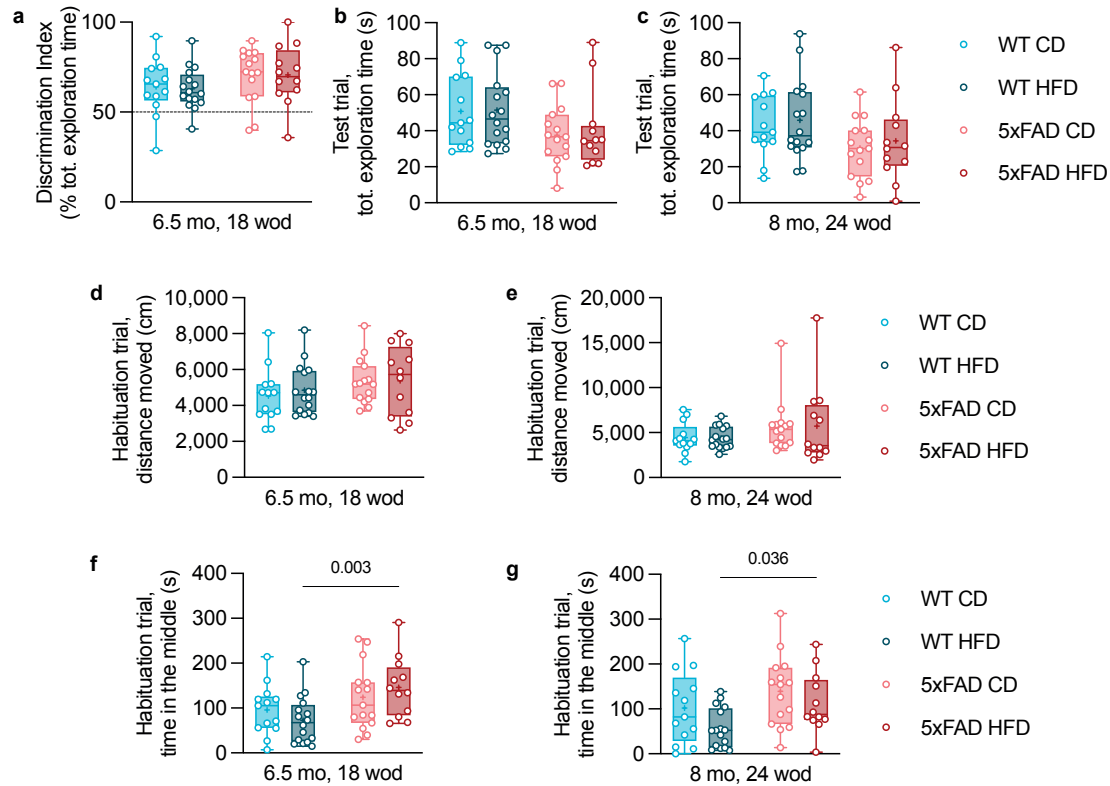

**Supplementary Fig. 2: Effects of AD and HFD on novelty discrimination at 6.5 mo and locomotor activity/anxiety at 6.5 and 8 mo in mice.** The mice are the same described in Fig. 1c, sample  $n$ : WT CD=13, WT HFD=16, 5xFAD CD=15, 5xFAD HFD=12. **a**, Novelty discrimination at 6.5 mo after 18 weeks of diet (wod). **b**, **c**, Total exploration time during the test trial of the NOR test at 6.5 (**b**) and 8 mo (**c**). **d**, **e**, Distance moved in the empty arena during the habituation trial of the NOR test at 6.5 (**d**) and 8 mo (**e**). **f**, **g**, Time spent in the middle of the empty arena during the habituation trial of the NOR test at 6.5 (**f**) and 8 mo (**g**). **a–g**, Statistical analyses: two-way ANOVA followed by Fisher's LSD *post hoc* test. Box plots represent the minimum and maximum values (whiskers), the first and third quartiles (box boundaries), the median (box internal line), and the mean (cross). Source data are provided as a Source Data file.

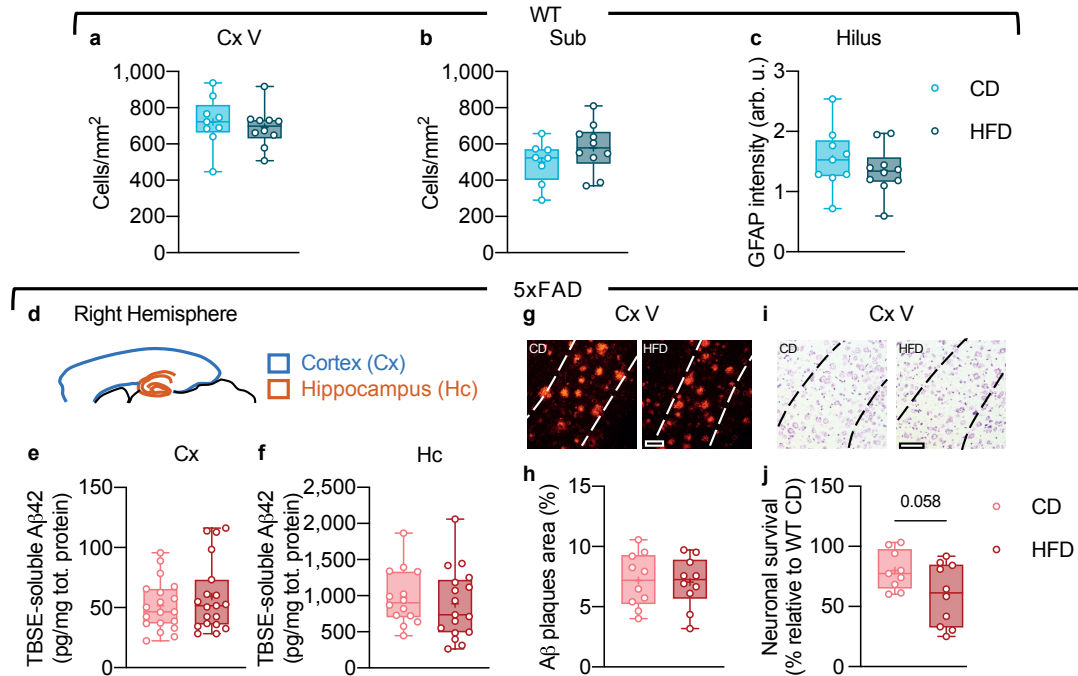

**Supplementary Fig. 3: Effects of HFD on the mouse brain pathology.** HFD did not affect neuronal density nor did it induce astrogliosis in WT mice after 28 weeks of diet. Assessment of neuronal density in the cortex layer V (Cx V; **a**) and subiculum (Sub; **b**) and expression of the astrocyte marker glial fibrillary acidic protein (GFAP) intensity in the hippocampal hilus (**c**) of WT mice. **c**, arb. u., arbitrary unit (average integrated density/100,000). Mice from two independent experiments, sample *n*: **a**, WT CD=9, WT HFD=10; **b**, WT CD=8, WT HFD=10; **c**, WT CD=9, WT HFD=10. **d–h**, HFD did not affect amyloid  $\beta$  load in 5xFAD mice. **d–f**, Determination of Tris Buffered Saline EDTA (TBSE)-soluble A $\beta$ 1-42 oligomers in the cortex (**d**, **e**) and hippocampus (**d**, **f**) of 5xFAD mice. **g**, **h**, Assessment of amyloid  $\beta$  plaques load. **i**, **j**, HFD marginally affected neuronal survival in the cortex of 5xFAD mice. **g**, **i**, Representative images, left: CD, right: HFD, scale bars: 70  $\mu$ m. **e**, **f**, **h**, **j**, Mice from two independent experiments, sample *n*: **e**, 5xFAD CD=19, 5xFAD HFD=19; **f**, 5xFAD CD=14, 5xFAD HFD=17; **h**, same animals as in Fig. 1f, sample *n*: 5xFAD CD=10, 5xFAD HFD=10; **j**, same animals as in Fig. 1h, sample *n*: 5xFAD CD=9, 5xFAD HFD=10. **j**, Data normalized by average WT CD value (**a**). **a–c**, **e**, **f**, **h**, **j**, Statistical analyses: two-tailed unpaired Student's *t*-test. Box plots represent the minimum and maximum values (whiskers), the first and third quartiles (box boundaries), the median (box internal line), and the mean (cross). Source data are provided as a Source Data file.

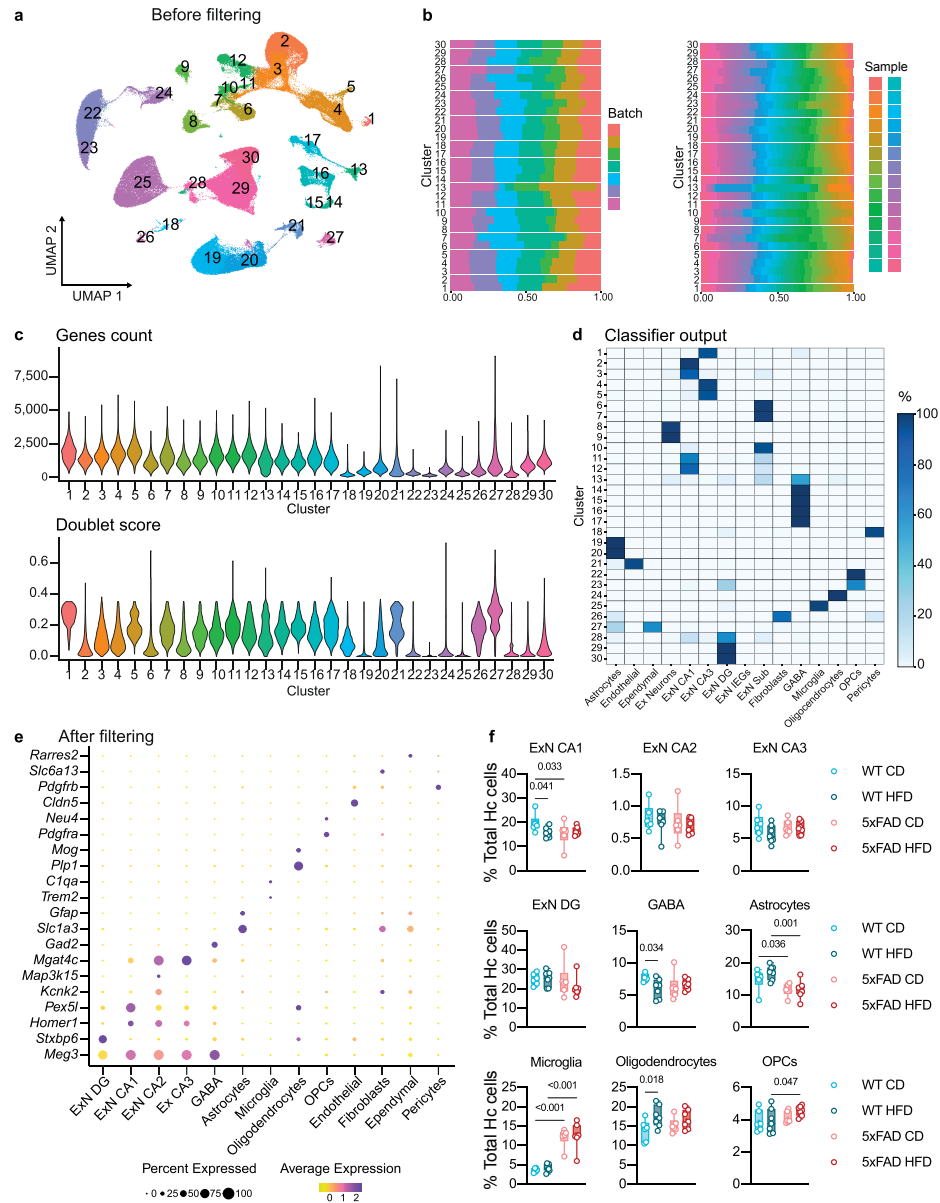

**Supplementary Fig. 4. sNuc-Seq of the mouse hippocampus.** **a**, UMAP embedding of pre-filtered 269,503 single nuclei profiles (sNuc-Seq), featuring doublet cells and clusters that were excluded from the analysis, colored by clusters. Mice are the same described in Fig. 2a–m, sample  $n=28$ . **b**, Similar distribution of cells per cluster across samples and batches. Cluster annotations are as in **a**. The percentage of cells per cluster, from the different batches (left) and from each sample (right), are colored by batch or sample. **c**, Violin plots showing the distribution of number of genes (top) and doublet score (bottom) detected in each cluster (Methods, *Quality controls for*

*sequencing and pre-processing of sNuc-Seq data* section). Cluster annotations are as in **a**. **d**, Output of cell type classifier (logistic regression; Methods, *Identification of clusters' cell types* section). Heatmap showing the fraction of cells classified to known hippocampal cell types (X axis) out of each cell cluster (Y axis). Cluster annotations are as in **a**. Abbreviations: Ex Neurons, excitatory neurons; ExN CA1–3, excitatory neurons of the *cornu Ammonis* regions 1–3; ExN DG, excitatory neurons of the dentate gyrus; ExN IEGs, recently activated excitatory neurons expressing immediate early genes; GABA, GABAergic neurons; OPCs, oligodendrocyte precursor cells; Sub, subiculum. **e**, **f**, Cell type annotations post filtering. **e**, Dot plot featuring the expression of marker genes (color scale) across cell types and the percentage of cells expressing them (dot size). **f**, Changes in the frequency of neuronal and non-neuronal cell types across experimental conditions. Hc, hippocampus. For quantifications and statistical analyses, 219,237 nuclei were included from  $n=26$  samples: WT CD=6, WT HFD=7, 5xFAD CD=6, 5xFAD HFD=7 (Methods, *Cell fraction estimations and statistics* section). Statistical analyses: two-way ANOVA followed by Fisher's LSD *post hoc* test. Box plots represent the minimum and maximum values (whiskers), the first and third quartiles (box boundaries), the median (box internal line), and the mean (cross). Source data are provided as a Source Data file.



section). Statistical analyses: two-way ANOVA followed by Fisher's LSD *post hoc* test. Box plots represent the minimum and maximum values (whiskers), the first and third quartiles (box boundaries), the median (box internal line), and the mean (cross). Source data are provided as a Source Data file. **b**, Quality controls for microglia and other immune cells sub-clustering analysis (sample  $n=28$ ). Abbreviations: DAMs, disease-associated microglia; HMG, homeostatic microglia; PVMs, perivascular macrophages; RMG, replicating microglia. Left: frequency of cells per cluster, from the different batches (top) and from each sample (bottom). Right: violin plots showing the distribution of number of genes (top), number of transcripts (middle), and doublet score (bottom) detected in each cluster. **c**, Dot plot featuring the expression of marker genes (color scale) and the percentage of cells expressing them (dot size) of microglia states and other immune cell types. **d–g**, Quality controls for astrocytes (**d**, **e**) and oligodendrocytes (**f**, **g**) sub-clustering analysis (sample  $n=28$ ). Abbreviations: AST1–3, astrocyte clusters 1–3; COPs, committed oligodendrocyte precursors; DAAs, disease-associated astrocytes; DOLs, disease-associated oligodendrocytes; OLG1,2, oligodendrocyte clusters 1, 2. Left: frequency of cells per cluster, from the different batches (top) and from each sample (bottom). Right: violin plots showing the distribution of number of genes (top), number of transcripts (middle), and doublet score (bottom) detected in each cluster. **e**, **g**, Dot plots featuring the expression of marker genes (color scale) and the percentage of cells expressing them (dot size) of astrocytes (**e**) and oligodendrocytes (**g**).



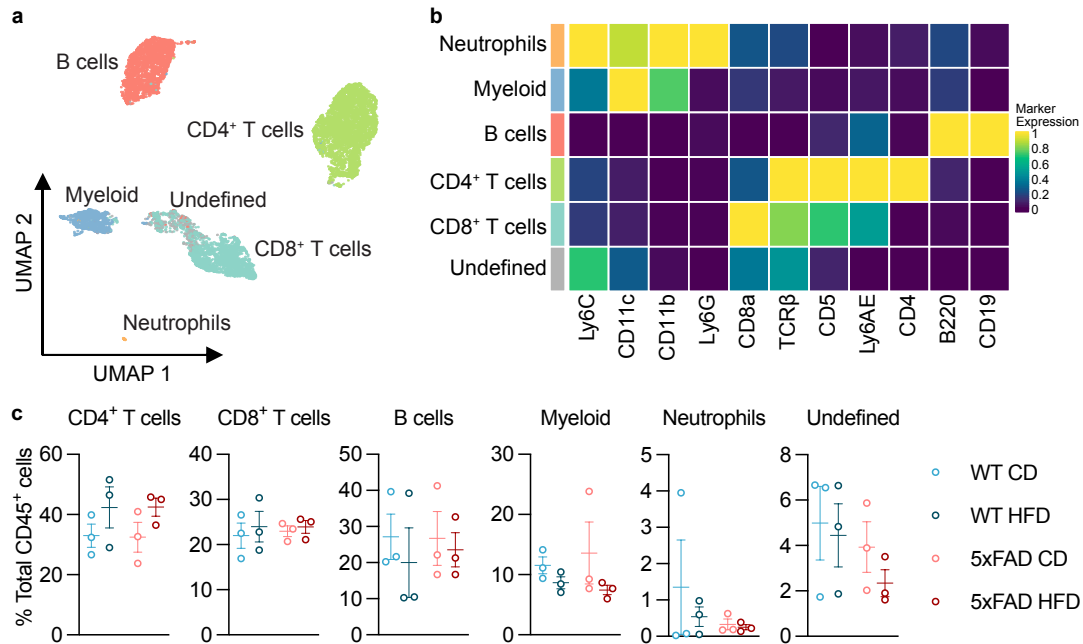

**Supplementary Fig. 6: Effects of AD and HFD on the mouse blood immune profile.** **a**, UMAP embedding of immune cell clusters in the blood (1,000 CD45<sup>+</sup> cells, randomly selected from each animal). FlowSOM-based immune cell populations are overlaid as a color dimension. **b**, Mean expression levels of markers detected across immune subpopulations. **c**, Frequency of the identified blood immune cell clusters. Data from one experiment, sample *n*: WT CD=3 (males), WT HFD=3 (2 females, 1 male), 5xFAD CD=3 (females), 5xFAD HFD=3 (females). Statistical analyses: two-way ANOVA followed by Fisher's LSD *post hoc* test. Bars show the mean and the standard error of the mean. Source data are provided as a Source Data file.

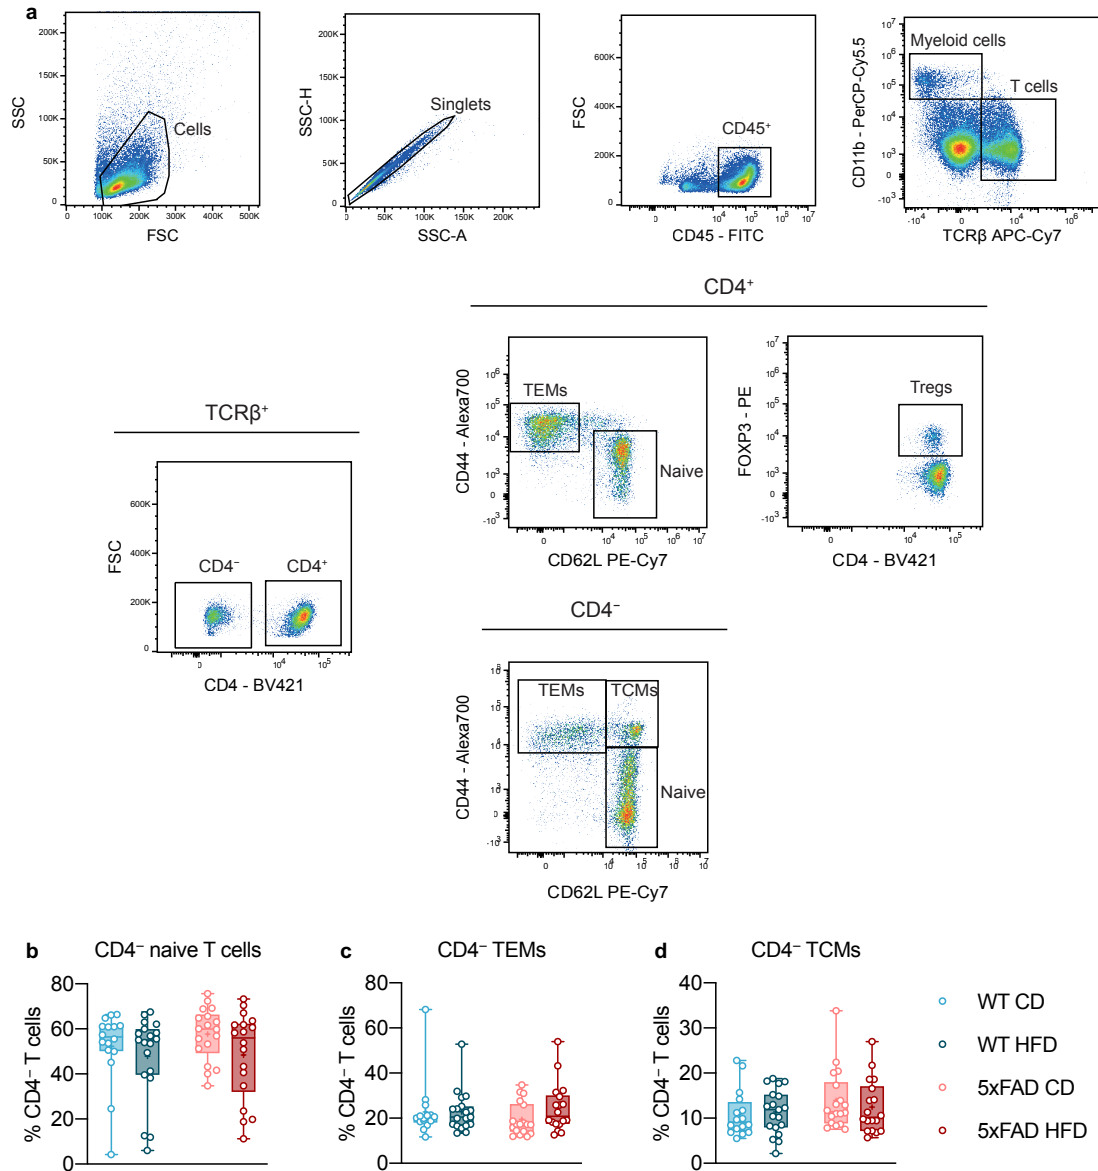

**Supplementary Fig. 7: HFD did not affect the splenic CD4<sup>-</sup> T-cell compartment in mice.** Mice are the same described in Fig. 3a–c, sample *n*: WT CD=16, WT HFD=19, 5xFAD CD=18, 5xFAD HFD=18. **a**, Flow cytometric characterization of the CD4<sup>+</sup> and CD4<sup>-</sup> T-cell compartments, gating strategy. **b–d**, Quantification of splenic frequencies of CD4<sup>-</sup> naive T cells (CD44<sup>low</sup>CD62L<sup>high</sup>; **b**), CD4<sup>-</sup> TEMs (CD44<sup>high</sup>CD62L<sup>low</sup>; **c**), and CD4<sup>-</sup> TCMs (CD44<sup>high</sup>CD62L<sup>high</sup>; **d**). Statistical analyses: two-way ANOVA followed by Fisher's LSD *post hoc* test. Box plots represent the minimum and maximum values (whiskers), the first and third quartiles (box boundaries), the median (box internal line), and the mean (cross). Source data are provided as a Source Data file.

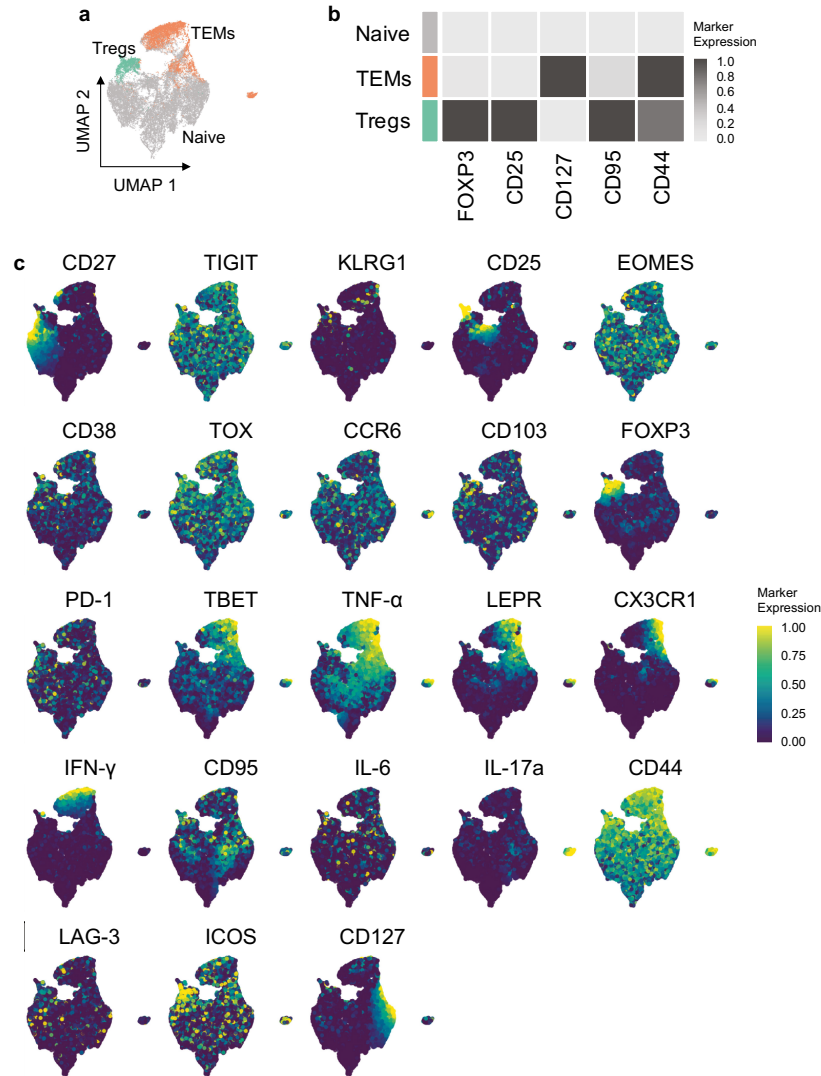

**Supplementary Fig. 8: Single-cell profiling of mouse splenic CD4<sup>+</sup> T cells by mass cytometry.**

Mice are the same described in Fig. 3e–f, sample *n*: WT CD=5, WT HFD=5, 5xFAD CD=5, 5xFAD HFD=5. **a**, UMAP embedding of CD4<sup>+</sup> cell clusters (2,000 cells, randomly selected from each animal). FlowSOM-based immune populations are overlaid as a color dimension. **b**, Mean expression levels of the markers used for UMAP visualization and FlowSOM clustering. **c**, The expression of each indicated marker is overlaid.

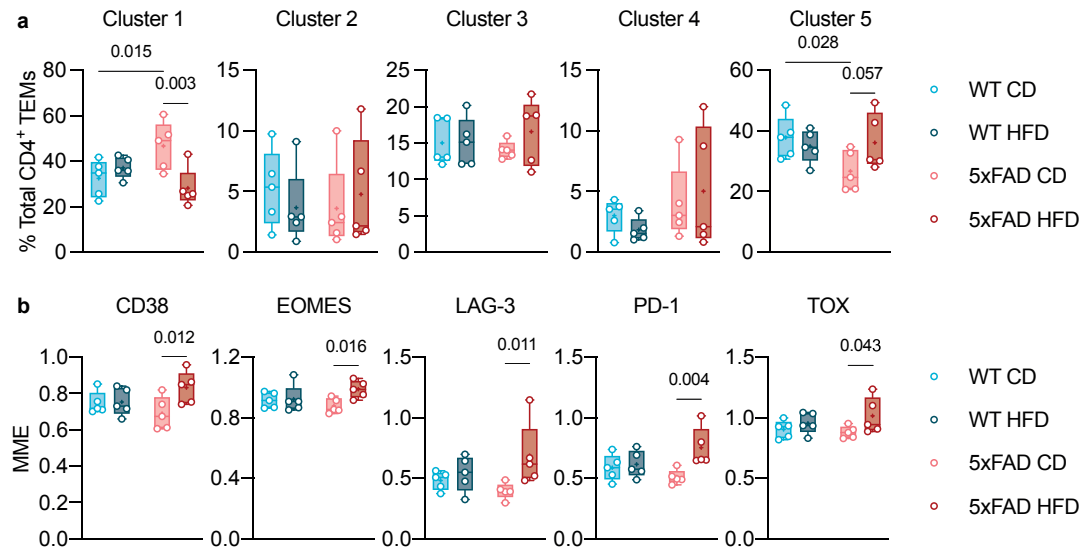

**Supplementary Fig. 9. Sub-clustering analysis of the splenic CD4<sup>+</sup> TEM compartment and expression of exhaustion-related markers in mice.** Mice are the same described in Fig. 3e–f, sample *n*: WT CD=5, WT HFD=5, 5xFAD CD=5, 5xFAD HFD=5. **a**, Sub-clustering analysis of the CD4<sup>+</sup> TEM compartment identified six clusters; plot relative to Cluster 6 is reported in Fig. 3f. **b**, HFD increased the expression of exhaustion markers in CD4<sup>+</sup> TEMs in 5xFAD mice. Expression of selected exhaustion-related markers. MME, mean marker expression. **a**, **b**, Statistical analyses: two-way ANOVA followed by Fisher’s LSD *post hoc* test. Box plots represent the minimum and maximum values (whiskers), the first and third quartiles (box boundaries), the median (box internal line), and the mean (cross). Source data are provided as a Source Data file.

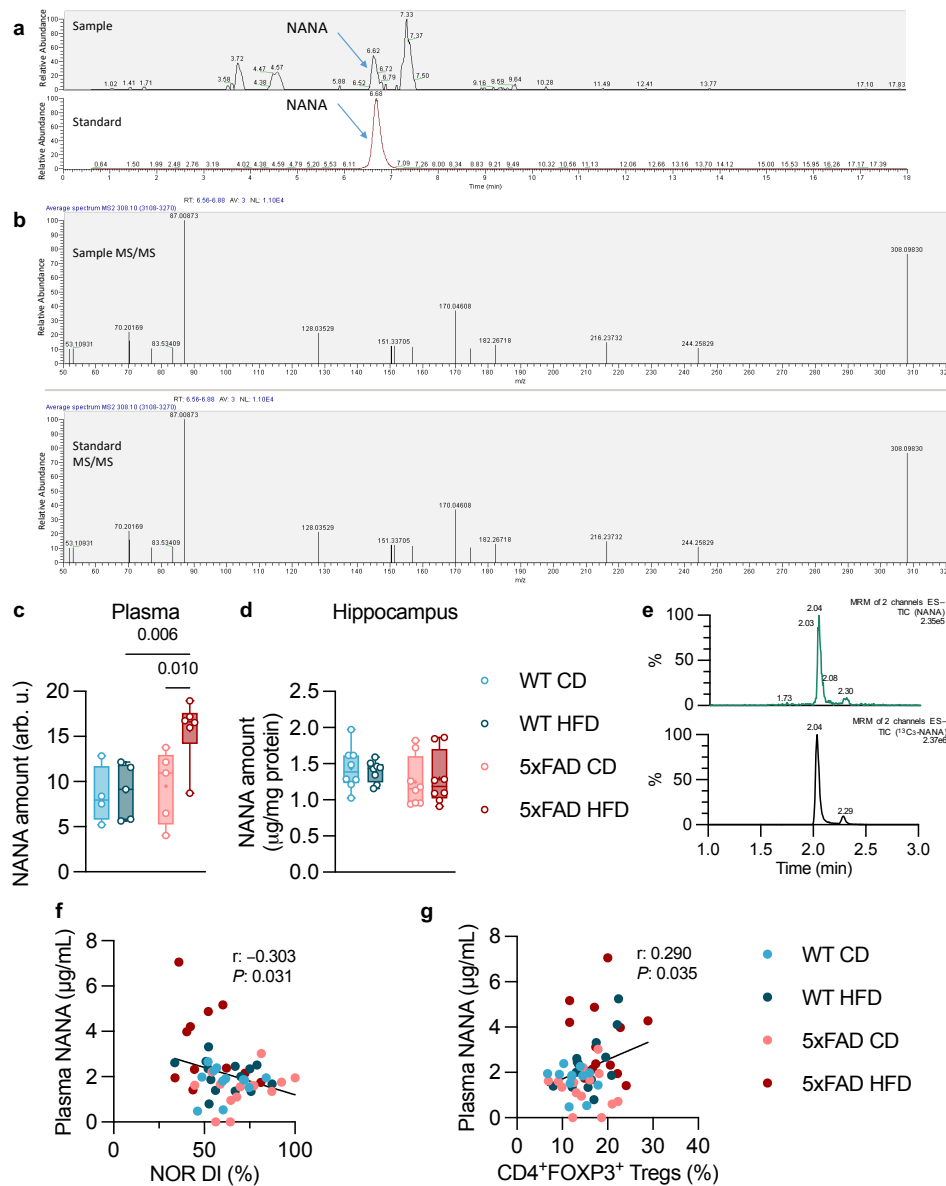

**Supplementary Fig. 10: Free NANA was elevated in the plasma but comparable to controls in the hippocampus of HFD-fed 5xFAD mice.** **a**, Representative mass chromatograms of NANA sample (top) and standard (bottom). **b**, Representative MS/MS spectra of NANA sample (top) and standard (bottom). **c**, Plasma levels of free NANA as detected by metabolite profiling; arb. u., arbitrary unit (normalized peak area/100,000). Mice are the same described in Fig. 4a–d, sample *n*: WT CD=4, WT HFD=5, 5xFAD CD=5, 5xFAD HFD=6. Statistical analysis: two-way ANOVA followed by Fisher's LSD *post hoc* test. **d**, Hippocampal levels of free NANA (TBSE-soluble fraction) as detected by LC-MS/MS. Mice from two independent experiments, sample *n*: WT CD=8, WT HFD=8, 5xFAD CD=8, 5xFAD HFD=8. Statistical analysis: two-way ANOVA

followed by Fisher's LSD *post hoc* test. **c**, **d**, Box plots represent the minimum and maximum values (whiskers), the first and third quartiles (box boundaries), the median (box internal line), and the mean (cross). **e**, Representative LC-MS/MS chromatograms of NANA standard (100 ng/mL; top) and  $^{13}\text{C}_3$ -NANA internal standard (1 ug/mL; bottom). **f**, **g**, Simple linear regression (black line) and Pearson's correlation (r coefficient, two-tailed *P*-value) between NANA levels, as quantified after fluorometric assay (Fig. 4e), and NOR discrimination index (DI; **f**), and between NANA levels and splenic Tregs abundance (**g**). Mice from two independent experiments, sample *n*: **f**, WT CD=12, WT HFD=14, 5xFAD CD=14, 5xFAD HFD=11; **g**, WT CD=12, WT HFD=14, 5xFAD CD=14, 5xFAD HFD=13. **c–g**, Source data are provided as a Source Data file.

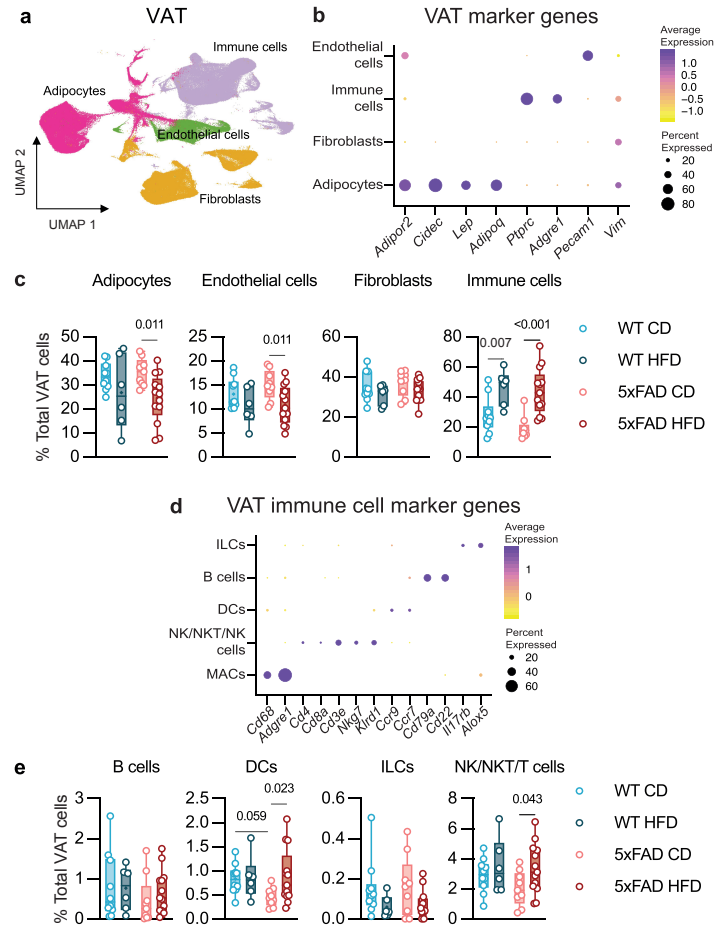

**Supplementary Fig. 11: sNuc-Seq of the mouse visceral adipose tissue.** Mice are the same described in Fig. 5a–d, sample  $n$ : WT CD=10, WT HFD=6, 5xFAD CD=9, 5xFAD HFD=13. **a–c**, Main cell populations in the mouse gonadal visceral adipose tissue (VAT) across all genotype and diet conditions. **a**, UMAP embedding of single nuclei profiles (sNuc-Seq), colored after *post hoc* cell type annotation. **b**, Dot plot featuring the expression of marker genes (color scale) and the percentage of cells expressing them (dot size) of VAT cell types. **c**, Changes in frequency of cell types across experimental conditions. **d, e**, Sub-clustering analysis of VAT immune cells. **d**, Dot plot featuring the expression of marker genes (color scale) and the percentage of cells expressing them (dot size) of VAT immune cell types. **e**, Changes in frequency of cell types across experimental conditions. Plot relative to MACs is shown in Fig. 5b. Abbreviations: DCs, dendritic cells; ILCs, innate lymphoid cells; MACs, macrophages; NK, natural killer cells; NKT, natural killer T cells. **c, e**, Statistical analyses: two-way ANOVA followed by Fisher's LSD *post hoc* test. Box plots represent the minimum and maximum values (whiskers), the first and third quartiles

(box boundaries), the median (box internal line), and the mean (cross). Source data are provided as a Source Data file.



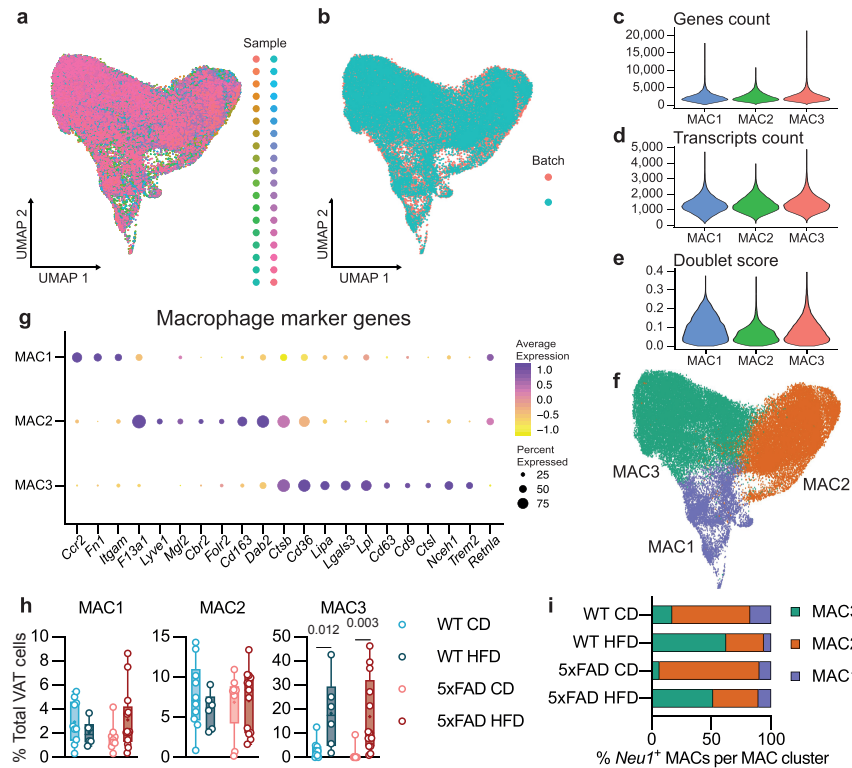

**Supplementary Fig. 12: Sub-clustering analysis of mouse visceral adipose tissue macrophages.** Mice are the same described in Fig. 5a–d, sample  $n$ : WT CD=10, WT HFD=6, 5xFAD CD=9, 5xFAD HFD=13. Three MAC clusters were identified, annotated as MAC1–3. **a–e**, Quality controls for visceral adipose tissue (VAT) macrophages sub-clustering analysis. **a**, **b**, Macrophage cells in VAT cluster independently of sample (**a**) and batch effects (**b**). **c–e**, Violin plots showing the distribution of number of genes (**c**), number of transcripts (**d**), and doublet scores (**e**) detected in each MAC cluster. **f**, VAT MAC clusters, UMAP embedding of single nuclei profiles (sNuc-Seq), colored after *post hoc* cell type annotation. **g**, Dot plot featuring the expression of marker genes (color scale) and the percentage of cells expressing them (dot size) of VAT MACs. **h**, Changes in frequency of MAC clusters across experimental conditions. Statistical analyses: two-way ANOVA followed by Fisher’s LSD *post hoc* test. Box plots represent the minimum and maximum values (whiskers), the first and third quartiles (box boundaries), the median (box internal line), and the mean (cross). **i**, Stacked bar plot showing the distribution of *Neu1*-expressing macrophages in each MAC cluster across experimental conditions. Note: In one of the 5xFAD CD mice, *Neu1*-expressing macrophages were below detection level in all MAC clusters. **h**, **i**, Source data are provided as a Source Data file.

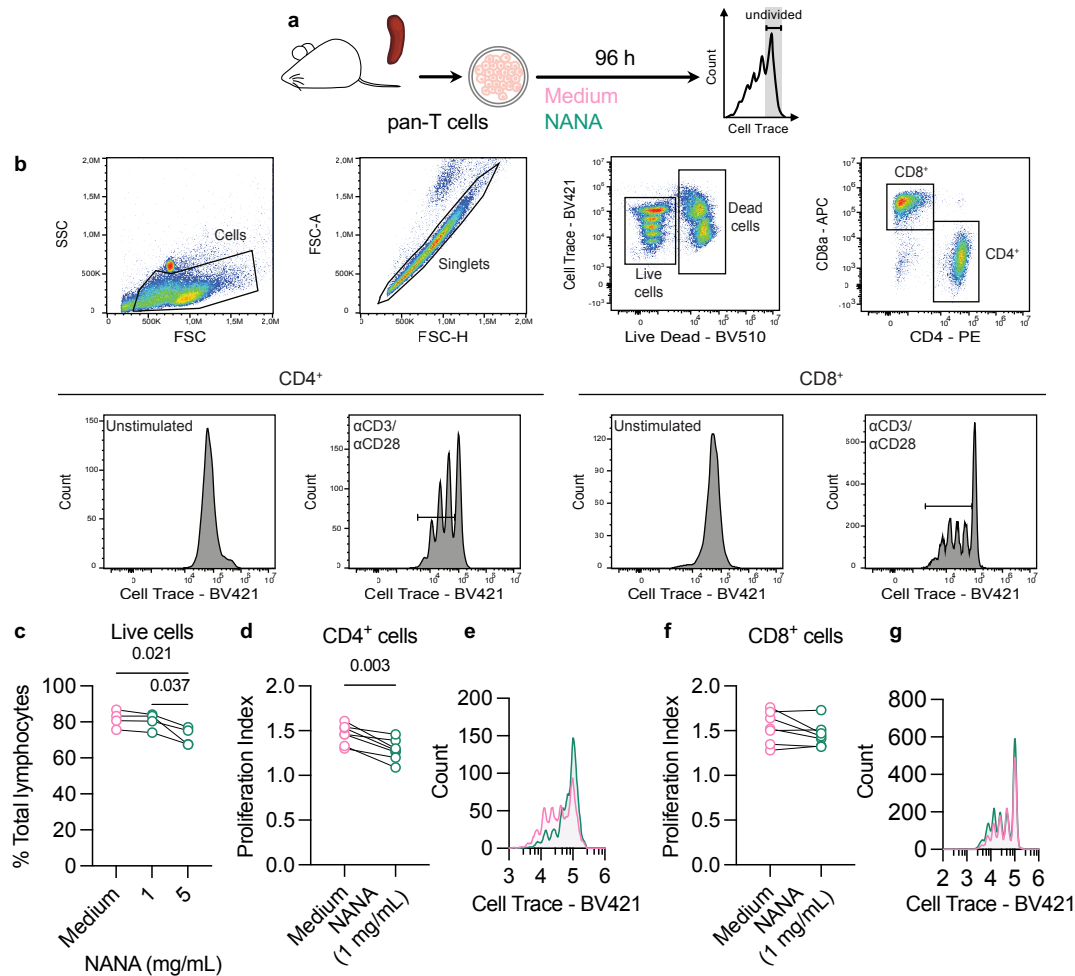

**Supplementary Fig. 13: NANA treatment impaired mouse CD4<sup>+</sup> T-cell proliferation *in vitro*.**

**a**, Schematic presentation of treatment regimen of mouse pan-T-cell cultures and proliferation assay. **b**, Flow cytometric analysis of CD4<sup>+</sup> and CD8<sup>+</sup> T-cell proliferation, gating strategy. **c**, Viability assay with two different concentrations of NANA. Data from one experiment, sample  $n=4$  mice. From each individual mouse, one aliquot of splenocytes was treated with NANA 1 mg/mL, one with NANA 5 mg/mL, and one with medium as control. Black lines connect paired points. Statistical analyses: one-way within-subjects ANOVA followed by Fisher's LSD *post hoc* test. **d–g**, NANA exposure reduced proliferation of CD4<sup>+</sup> (**d**, **e**), but not CD8<sup>+</sup> T cells (**f**, **g**). **e**, **g**, Histograms of representative samples. Data from two independent experiments, of which one is the same described in **c**, sample  $n=7$  mice. From each individual mouse, one aliquot of splenocytes was treated with NANA 1 mg/mL, and one with medium as control. **d**, **f**, Black lines connect

paired points. Statistical analyses: paired two-tailed Student's *t*-test. **c–g**, Source data are provided as a Source Data file.

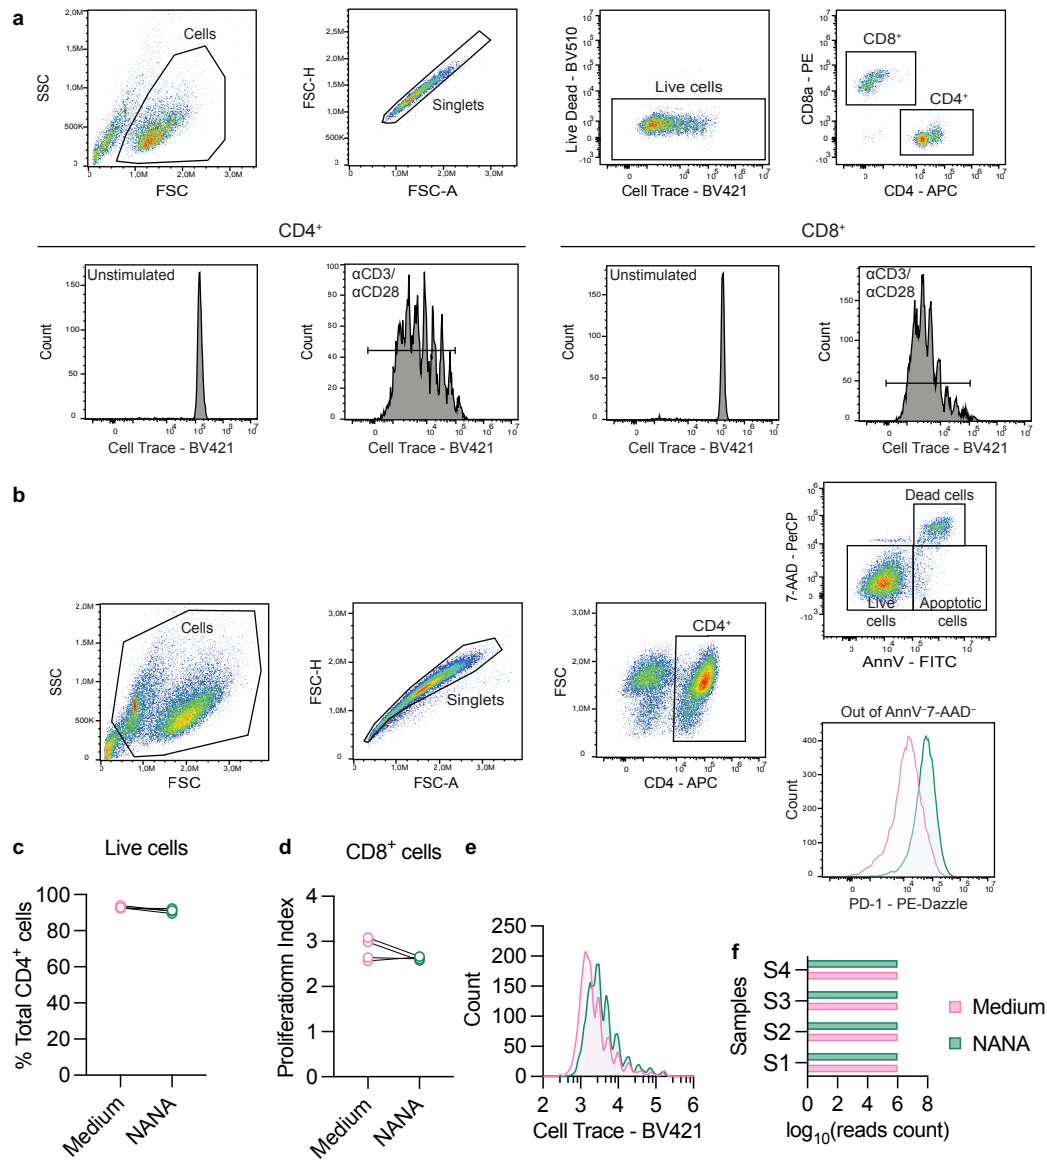

**Supplementary Fig. 14: NANA treatment had no impact on human CD4<sup>+</sup> T-cell viability and human CD8<sup>+</sup> T-cell proliferation.** **a, b**, Flow cytometric analysis of human CD4<sup>+</sup> and CD8<sup>+</sup> T-cell proliferation (**a**) and apoptosis/viability assay (**b**), gating strategy. **b**, PD-1 expression (geometric mean fluorescence intensity) was evaluated in annexin V (AnnV)/7-amino-actinomycin D (7-AAD)-double negative cells. **c**, NANA exposure did not affect CD4<sup>+</sup> T-cell viability. **d**, NANA exposure did not affect human CD8<sup>+</sup> T-cell proliferation. **e**, Histograms of a representative sample. **c, d**, Data refer to the analysis of the same samples described in Fig. 6a–e, sample  $n=4$  human individuals (blood). Black lines connect paired points. Statistical analyses: paired two-tailed Student's  $t$ -test. **f**, Quality control for bulk RNA-Seq of human T-cell cultures.

Reads count per sample ( $\log_{10}$ ). For each sample, 24,594 genes were used. Data refer to the analysis of the same samples described in Fig. 6f, g, sample  $n=4$  human individuals (blood). S1–4: subject 1–4. **c–f**, Source data are provided as a Source Data file.

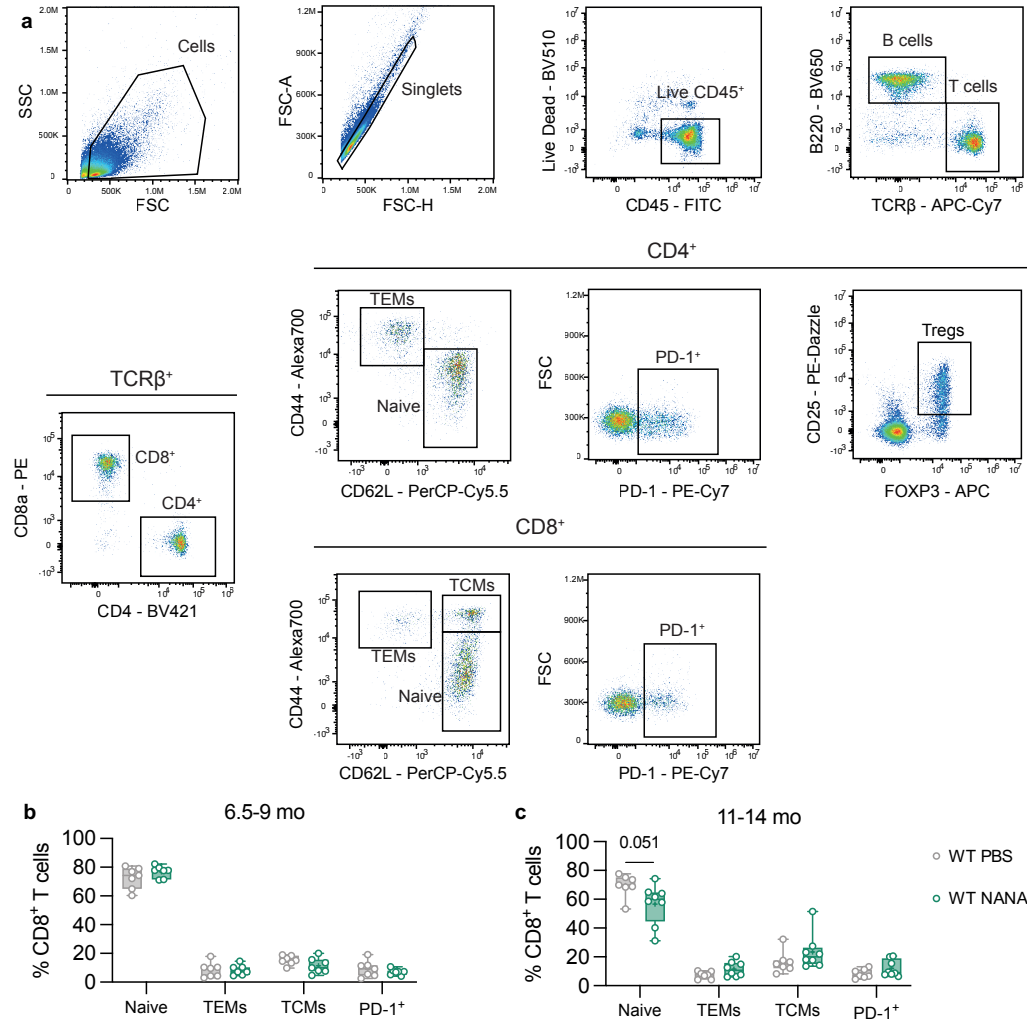

**Supplementary Fig. 15: NANA treatment did not affect the splenic CD4<sup>+</sup>/CD8<sup>+</sup> T-cell profile of young-adult mice or the splenic CD8<sup>+</sup> T-cell profile of middle-aged mice. **a**, Flow cytometric characterization of the CD4<sup>+</sup> and CD8<sup>+</sup> T-cell compartments, gating strategy. **b**, **c**, Quantification of splenic frequencies of CD8<sup>+</sup> naive T cells (CD44<sup>low</sup>CD62L<sup>high</sup>), CD8<sup>+</sup> TEMs (CD44<sup>high</sup>CD62L<sup>low</sup>), CD8<sup>+</sup> TCMs (CD44<sup>high</sup>CD62L<sup>high</sup>), and CD8<sup>+</sup>PD1<sup>+</sup> T cells in young-adult (**b**) and middle-aged WT mice (**c**). Mice are the same described in Fig. 7b, c, sample *n*: **b**, PBS=7, NANA=7; **c**, PBS=7, NANA=8. Statistical analyses: multiple two-tailed unpaired Student's *t*-tests. Box plots represent the minimum and maximum values (whiskers), the first and third quartiles (box boundaries), the median (box internal line), and the mean (cross). Source data are provided as a Source Data file.**

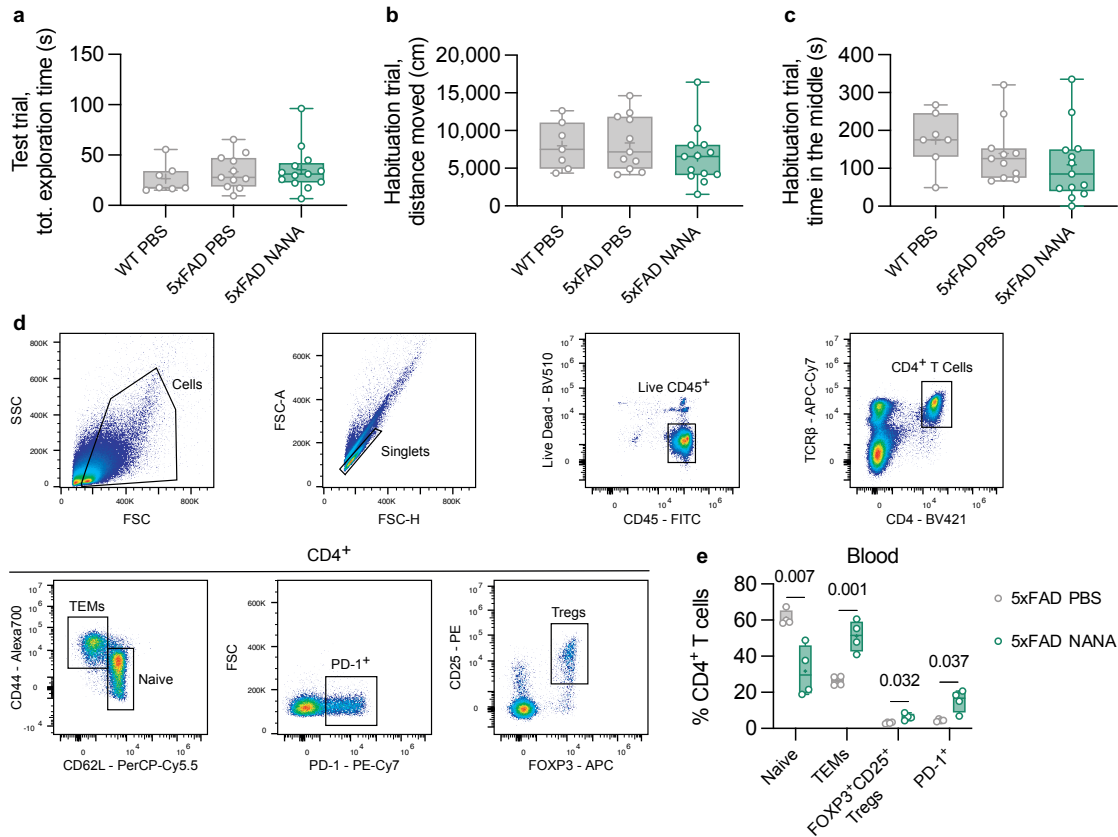

**Supplementary Fig. 16: Effects of NANA administration on locomotor activity/anxiety and spleen and blood T-cell profile of 5xFAD mice 3 weeks after end of treatment.** **a**, Total exploration time during the test trial of the NOR test. **b**, Distance moved in the empty arena during the habituation trial of the NOR test. **c**, Time spent in the middle of the empty arena during the habituation trial of the NOR test. Mice are the same described in Fig. 7e, sample *n*: WT PBS=7, 5xFAD PBS=11, 5xFAD NANA=13. Statistical analyses: one-way ANOVA followed by Fisher's LSD *post hoc* test. **d**, **e**, Flow cytometric characterization of the CD4<sup>+</sup> T-cell compartment in the blood of 5xFAD mice treated with NANA. **d**, Gating strategy. **e**, Blood CD4<sup>+</sup> T-cell profile. Mice are from one of the three cohorts described in Fig. 7e, age at cognitive assessment: 9 mo, sample *n*: 5xFAD PBS=4, 5xFAD NANA=4. Statistical analyses: multiple two-tailed unpaired Student's *t*-tests. Note: For FOXP3<sup>+</sup>CD25<sup>+</sup> Tregs and PD-1<sup>+</sup>, Welch's correction was used (Methods, *Statistical analyses* section). **a–c**, **e**, Box plots represent the minimum and maximum values (whiskers), the first and third quartiles (box boundaries), the median (box internal line), and the mean (cross). Source data are provided as a Source Data file.

**Supplementary Table 1. Fluorochrome-labeled monochrome antibodies used in the study.**

| <b>Antigen</b> | <b>Fluorophore</b> | <b>Dilution</b> | <b>Supplier</b> | <b>Cat. #</b> |
|----------------|--------------------|-----------------|-----------------|---------------|
| CD62L          | PE-Cy7             | 1:150           | Biolegend       | 104418        |
| CD11b          | PerCP-Cy5.5        | 1:200           | Biolegend       | 101228        |
| CD44           | AlexaFluor700      | 1:150           | Biolegend       | 103026        |
| TCR $\beta$    | APC-Cy7            | 1:150           | Biolegend       | 109220        |
| CD4            | BV421              | 1:150           | Biolegend       | 100544        |
| CD45           | FITC               | 1:150           | Biolegend       | 103108        |
| FOXP3          | PE                 | 1:150           | Biolegend       | 126404        |
| B220           | BV650              | 1:150           | Biolegend       | 103241        |
| CD8a           | PE                 | 1:150           | Biolegend       | 100708        |
| PD-1           | PE-Cy7             | 1:100           | Biolegend       | 109110        |
| FOXP3          | APC                | 1:100           | Invitrogen      | 17-5773-82    |
| CD62L          | PerCP-Cy5.5        | 1:150           | Biolegend       | 104432        |
| CD4            | APC                | 1:150           | Biolegend       | 100412        |
| CD4            | PE                 | 1:150           | Biolegend       | 100408        |
| CD8a           | APC                | 1:200           | Biolegend       | 100712        |
| CD8a           | PE                 | 1:200           | Biolegend       | 300908        |
| CD4            | APC                | 1:200           | Biolegend       | 317416        |
| PD-1           | PE-Dazzle          | 1:100           | Biolegend       | 329940        |



|      |           |       |           |        |
|------|-----------|-------|-----------|--------|
| CD25 | PE        | 1:100 | Biolegend | 162104 |
| CD25 | PE-Dazzle | 1:100 | Biolegend | 102048 |

**Supplementary Table 2. Heavy metal-conjugated antibodies used in the study.** Anti-mouse antibodies were either purchased pre-conjugated to heavy-metal isotopes (Fluidigm) or conjugated using the MIBItag Conjugation protocol (IONpath). Fluidigm antibodies were used according to manufacturer instructions (1  $\mu$ l per  $3 \times 10^6$  cells). In-house conjugated antibodies were used at a dilution of 1:50.

| Antigen            | Metal             | Supplier  | Cat. #   | Clone   | Tissue | In-house conj. | Staining step |
|--------------------|-------------------|-----------|----------|---------|--------|----------------|---------------|
| CD45               | $^{89}\text{Y}$   | Fluidigm  | 3089005B | 30-F11  | Sp, B  |                | S             |
| CD27               | $^{113}\text{In}$ | Biolegend | 124202   | LG.3A10 | Sp     | yes            | S             |
| TCR $\gamma\delta$ | $^{115}\text{In}$ | R&D       | MAB7297  | GL-3    | Sp     | yes            | S             |
| Ly6G               | $^{141}\text{Pr}$ | Fluidigm  | 3141008B | 1A8     | B      |                | S             |
| CD11c              | $^{142}\text{Nd}$ | Fluidigm  | 3142003B | N418    | B      |                | S             |
| TCR $\beta$        | $^{143}\text{Nd}$ | Fluidigm  | 3143010B | H57-597 | Sp, B  |                | S             |
| B220               | $^{144}\text{Nd}$ | Fluidigm  | 3144011B | RA3-6B2 | B      |                | S             |
| CD4                | $^{145}\text{Nd}$ | Fluidigm  | 3145002B | RM4-5   | Sp, B  |                | S, I          |
| CD8a               | $^{146}\text{Nd}$ | Fluidigm  | 3146003B | 53-6.7  | B      |                | S             |
| TIGIT              | $^{146}\text{Nd}$ | Biolegend | 142102   | 1G9     | Sp     | yes            | S             |
| KLRG1              | $^{147}\text{Sm}$ | R&D       | MAB69441 | 2F1     | Sp     | yes            | S             |

|        |                   |                  |            |            |       |     |   |
|--------|-------------------|------------------|------------|------------|-------|-----|---|
| CD11b  | <sup>148</sup> Nd | Fluidigm         | 3148003B   | M1/70      | Sp, B |     | S |
| CD19   | <sup>149</sup> Sm | Fluidigm         | 3149002B   | 6D5        | B     |     | S |
| CD25   | <sup>150</sup> Nd | Fluidigm         | 3150002B   | 3C7        | Sp    |     | S |
| CD8a   | <sup>153</sup> Eu | Fluidigm         | 3153012B   | 53-6.7     | Sp    |     | S |
| CD38   | <sup>154</sup> Sm | Biolegend        | 102702     | 90         | Sp    | yes | S |
| CCR6   | <sup>156</sup> Gd | Fluidigm         | 3156016A   | 29-2L17    | Sp    |     | S |
| CD103  | <sup>157</sup> Gd | Biolegend        | 121402     | 2E7        | Sp    | yes | S |
| PD-1   | <sup>159</sup> Tb | Fluidigm         | 3159006B   | RMP1-30    | Sp    |     | S |
| CD5    | <sup>160</sup> Gd | Fluidigm         | 3160002B   | 53-7.3     | B     |     | S |
| LEPR   | <sup>163</sup> Dy | R&D              | AF497      | Polyclonal | Sp    | yes | S |
| Ly6AE  | <sup>164</sup> Dy | Fluidigm         | 3164005B   | D7         | B     |     | S |
| CX3CR1 | <sup>164</sup> Dy | Fluidigm         | 3164023B   | SA011F11   | Sp    |     | S |
| CD95   | <sup>166</sup> Er | R&D              | AF435      | Polyclonal | Sp    | yes | S |
| CD44   | <sup>171</sup> Yb | Fluidigm         | 3171003B   | IM7        | Sp    |     | S |
| LAG-3  | <sup>174</sup> Yb | Fluidigm         | 3174019B   | C9B7W      | Sp    |     | S |
| CD127  | <sup>175</sup> Lu | Fluidigm         | 3175006B   | 3174013B   | Sp    |     | S |
| ICOS   | <sup>176</sup> Yb | Fluidigm         | 3176014B   | 7E.17G9    | Sp    |     | S |
| EOMES  | <sup>152</sup> Sm | Biolegend        | MAB8889    | 1219A      | Sp    | yes | I |
| TOX    | <sup>155</sup> Gd | Thermo<br>Fisher | 14-6502-95 | TXRX10     | Sp    | yes | I |

---

|               |                   |          |          |                  |    |   |
|---------------|-------------------|----------|----------|------------------|----|---|
| FOXP3         | <sup>158</sup> Gd | Fluidigm | 3158003A | FJK-16s          | Sp | I |
| TBET          | <sup>161</sup> Dy | Fluidigm | 3161014B | 4B10             | Sp | I |
| TNF- $\alpha$ | <sup>162</sup> Dy | Fluidigm | 3162002B | MP6-XT22         | Sp | I |
| Ly6C          | <sup>162</sup> Dy | Fluidigm | 3162014B | HK1.4            | B  | S |
| IFN- $\gamma$ | <sup>165</sup> Ho | Fluidigm | 3165003B | XMG1.2           | Sp | I |
| IL-6          | <sup>167</sup> Er | Fluidigm | 3167003B | MP5-20F3         | Sp | I |
| IL-17a        | <sup>169</sup> Tm | Fluidigm | 3169005B | TC11-<br>18H10.1 | Sp | I |

---

Abbreviations: B, blood; I, intracellular staining; S, surface staining; Sp, spleen.
